# Supplementary material for: Related Factors Affecting the Survival Status of the Cracked Teeth After Root Canal Therapy: A Retrospective Study
Source: Research Square preprint supplement (doi:10.21203/rs.3.rs-7785856/v1), 2026-02-02
Supplement: Supplementary file 1 [file 8a80d84b5ba49ee1486e3f96.xlsx]

## Sheet: 表1
TABLE 1. The Distribution of Cracked Teeth
Location of tooth	Sex			Age(y)					Total, n(%)
	Male	Female		20–29	30–39	40–49	50–59	≥60
Maxillary
1st premolar	2	3		1	2	1	1	0	5(2.3)
2nd premolar	4	9		1	4	2	3	3	13(5.9）
1st molar	39	48		7	38	22	11	9	87（39.4）
2nd molar	27	18		6	18	11	7	3	45（20.4）
Total	72	78		15	62	36	22	15	150（67.9）
Mandibular
1st premolar	2	0		0	2	0	0	0	2（0.9）
2nd premolar	2	1		0	2	0	0	1	3（1.4）
1st molar	26	14		2	16	13	6	3	40（18.1）
2nd molar	16	10		3	10	4	7	2	26（11.8）
Total	46	25		5	30	17	13	6	71（32.1）
Total n(%)	118(53.4)	103(46.6)		20(9.0)	92(41.6)	53(24.0)	35(15.8)	21(9.5)	221(100)

## Sheet: 表2
Table 2. Kaplan–Meier Estimated Survival Rates at 1, 3, and 5 Years
Follow-up time (years)	Estimated survival(%)	95% confidence interval	Patients at risk
1	88.62	84.4-92.8	209
3	75.77	69.9-81.7	117
5	74.15	67.9-80.4	26.5

## Sheet: 表3
TABLE 3. Association between Tooth Survival Status and Explanatory Variables
Factor	Proportion extracted (%)	Hazard Ratio	95% confidence interval	P value*
Pre-treatment
Age（per 1 year）	-	1	0.98-1.03	0.95
20–29	5/20(25.0)	-	-	-
30–39	19/92(20.7)	-	-	-
40–49	15/53(28.3)	-	-	-
50–59	11/35(31.4)	-	-	-
≥60	2/21 (9.5)	-	-	-
Gender
Male	23/118(19.5)	Reference	-	-
Female	29/103(28.2)	1.532	0.89-2.65	0.127
Arch
Maxillary	36/150(24.0)	Reference	-	-
Mandibular	16/71(22.5)	0.964	0.54-1.74	0.902
Tooth type
1st premolar	1/7(14.3)	Reference	-	-
2nd premolar	4/16((25.0)	1.927	0.22-17.24	0.558
1st molar	35/127(27.6)	2.146	0.29-15.67	0.452
2nd molar	12/71(16.9)	1.19	0.16-9.15	0.867
Initial diagnosis
Pulpitis	28/184(15.2)	Reference	-	-
Periapical periodontitis	24/37(64.9)	5.871	3.39-10.18	<0.001
Crack location
Mesial	24/112(21.4)	Reference	-	-
Distal	26/97(26.8)	1.294	0.74-2.25	0.363
Axial	2/12(16.7)	0.727	0.17-3.08	0.665
Probing depth
<3mm	4/43(9.3)	Reference	-	-
3mm~<6mm	44/174(25.3)	2.961	1.06-8.24	0.038
≥6mm	4/4(100.0)	34.858	8.44-143.98	<0.001
Percussion test
Negative	25/149(16.8)	Reference	-	-
Positive	27/72(37.5)	2.425	1.41-4.18	0.001
Bite test
Negative	22/121(18.2)	Reference	-	-
Positive	30/100(30.0)	1.763	1.02-3.06	0.043
Crown integrity
Intact	34/164(20.7)	Reference	-	-
Compromised	18/57(31.6)	1.544	0.87-2.73	0.136
Post-treatment
Full crown restoration
Yes	35/200(17.5)	Reference	-	-
No	17/21(81.0)	6.72	3.72-12.16	<0.001
Hard food chewing frequency
Yearly	5/49(10.2)	Reference	-	-
Monthly	21/86(24.4)	2.511	0.95-6.66	0.064
Weekly	18/64(28.1)	2.895	1.08-7.80	0.035
Daily	8/22(36.4)	3.927	1.28-12.01	0.016
Thermal alternation (hot/cold)
No	38/163(23.3)	Reference	-	-
Yes	14/58(24.1)	1.023	0.55-1.89	0.942
Chewing side preference
No	36/178(20.2)	Reference	-	-
Yes	16/43(37.2)	2.101	1.17-3.79	0.014

## Sheet: 表4
TABLE 4. Association between Tooth Survival Status and Explanatory Variables
Factor	Hazard Ratio	95% confidence interval	P value*
Initial diagnosis
Pulpitis	Reference	-	-
Periapical periodontitis	3.887	4.24-14.39	<0.001
Probing depth
<3mm	Reference	-	-
3mm~<6mm	1.299	0.44-3.83	0.636
≥6mm	9.53	2.20-41.23	0.003
Full crown restoration
Yes	Reference	-	-
No	8.055	4.27-15.18	<0.001
Chewing side preference
No	Reference	-	-
Yes	2.273	1.23-4.19	0.009

## Sheet: 表S1
Supplementary Table S1. Stepwise Cox regression procedure (Backward LR)
Step	Variables entered	Variables removed	–2 Log likelihood	Variables retained
1	Gender, Initial diagnosis, Probing depth, Percussion test,Bite test,Crown integrity,Full crown restoration,Hard food chewing frequency,Chewing side preference	–	449.419	All
2	–	Percussion test	449.43	Gender, Initial diagnosis, Probing depth, Bite test,Crown integrity,Full crown restoration,Hard food chewing frequency,Chewing side preference
3	–	Gender	449.702	Initial diagnosis, Probing depth, Bite test,Crown integrity,Full crown restoration,Hard food chewing frequency,Chewing side preference
4	–	Bite test	450.323	Initial diagnosis, Probing depth, Crown integrity,Full crown restoration,Hard food chewing frequency,Chewing side preference
5	–	Hard food chewing frequency	453.99	Initial diagnosis, Probing depth, Crown integrity,Full crown restoration,Chewing side preference
6(Final)	–	Crown integrity	455.658	Initial diagnosis, Probing depth, Full crown restoration,Chewing side preference

## Sheet: 表S2
Supplementary Table S2. Association between Probing depth and Periapical periodontitis
Factor	Periapical periodontitis, n (%)	Hazard Ratio	95% confidence interval	P value*
Probing depth（per 1 mm)		4.425	2.70-7.25	<0.001
<3mm	0/43(0）	Reference	-	-
3mm~<6mm	36/174(20.7)	22.93	1.38-381.38	0.029
≥6mm	1/4(25.0)	37.29	1.27-1095.97	0.036
统计方法
Binary logistic regression was performed to examine the association between probing depth and periapical periodontitis using Stata version 15.1 (StataCorp, College Station, TX, USA). However, because of complete separation in the distribution of probing depth categories, Firth’s penalized likelihood logistic regression was additionally employed to obtain unbiased and finite estimates of odds rati…
